# Supplementary material for: Tobacco smoking and risk of 36 cardiovascular disease subtypes: fatal and non-fatal outcomes in a large prospective Australian study
Source: Springer Nature journal article supplement (doi:10.1186/s12916-019-1351-4), 2019-07-03
Supplement: MOESM2 [file 16879180]

**TOBACCO SMOKING AND RISK OF 36 CARDIOVASCULAR DISEASE  
SUBTYPES: FATAL AND NON-FATAL OUTCOMES IN A LARGE  
PROSPECTIVE AUSTRALIAN STUDY**

Banks E, Joshy G, Korda RJ, Stavreski B, Soga K, Egger S, Day C, Clarke NE, Lewington S, Lopez AD

**Additional File 2: Supplementary tables and figures**

## Index

|                                                                                                                                                                                               |    |
|-----------------------------------------------------------------------------------------------------------------------------------------------------------------------------------------------|----|
| Table S1. Age standardised rates of CVD outcomes (fatal and non-fatal combined, and mortality separately) by sex and smoking status .....                                                     | 3  |
| Table S2: Outcomes for grouped CVD subtypes, in relation to smoking at baseline, excluding the first year of follow up .....                                                                  | 4  |
| A. Combined fatal and non-fatal outcomes .....                                                                                                                                                | 4  |
| B. Fatal outcomes only .....                                                                                                                                                                  | 5  |
| Table S3. Sensitivity analysis for combined fatal and non-fatal CVD outcomes, re-classifying past smokers who stopped smoking three or fewer years prior to baseline as current smokers. .... | 6  |
| Table S4: Non-fatal outcomes for selected CVD subtypes in relation to smoking status at baseline .....                                                                                        | 7  |
| Table S5. CVD subtypes (level 3 ICD-10 AM codes) ranked according to frequency of fatal and non-fatal outcomes .....                                                                          | 8  |
| Table S6: Outcomes for specific CVD subtypes (level 3 ICD-10-AM codes) with at least 50 events, in current and past smokers versus never smokers .....                                        | 9  |
| A. Combined fatal and non-fatal outcomes .....                                                                                                                                                | 9  |
| B. Fatal outcomes only .....                                                                                                                                                                  | 10 |
| Table S7. Smoking attributable fractions for CVD mortality and hospitalisation for acute coronary syndrome in Australia, using 2004-5 smoking prevalence estimates .....                      | 11 |
| Table S8. Selected grouped CVD subtypes in relation to smoking status at baseline by sex .....                                                                                                | 12 |
| A. Combined fatal and non-fatal events .....                                                                                                                                                  | 12 |
| B. Fatal events only .....                                                                                                                                                                    | 13 |

**Table S1. Age standardised rates of CVD outcomes (fatal and non-fatal combined, and fatal only separately) by sex and smoking status**

|                                          | Fatal and non-fatal outcomes |       |            |        |       |        |       |            |        |       | Fatal outcomes only |       |            |        |       |        |       |            |        |      |
|------------------------------------------|------------------------------|-------|------------|--------|-------|--------|-------|------------|--------|-------|---------------------|-------|------------|--------|-------|--------|-------|------------|--------|------|
|                                          | Men                          |       |            |        |       | Women  |       |            |        |       | Men                 |       |            |        | Women |        |       |            |        |      |
|                                          | Events                       | PY*   | Std rate** | 95% CI |       | Events | PY*   | Std rate** | 95% CI |       | Events              | PY*   | Std rate** | 95% CI |       | Events | PY*   | Std rate** | 95% CI |      |
| <b>Ischaemic heart disease (IHD)</b>     |                              |       |            |        |       |        |       |            |        |       |                     |       |            |        |       |        |       |            |        |      |
| Never                                    | 3284                         | 311.0 | 10.28      | 9.91   | 10.68 | 2908   | 511.7 | 5.25       | 5.05   | 5.46  | 268                 | 322.3 | 0.90       | 0.80   | 1.03  | 306    | 521.0 | 0.54       | 0.48   | 0.62 |
| Past                                     | 3313                         | 243.0 | 11.55      | 11.10  | 12.04 | 1208   | 224.8 | 5.87       | 5.51   | 6.25  | 314                 | 254.0 | 1.06       | 0.95   | 1.22  | 100    | 228.7 | 0.62       | 0.50   | 0.77 |
| Current                                  | 691                          | 51.1  | 14.83      | 13.45  | 16.37 | 374    | 56.9  | 9.02       | 7.84   | 10.38 | 76                  | 53.5  | 2.34       | 1.73   | 3.15  | 37     | 58.1  | 1.14       | 0.71   | 1.78 |
| <b>Acute myocardial infarction (AMI)</b> |                              |       |            |        |       |        |       |            |        |       |                     |       |            |        |       |        |       |            |        |      |
| Never                                    | 1231                         | 318.5 | 3.87       | 3.64   | 4.12  | 1087   | 518.2 | 1.96       | 1.84   | 2.10  | 132                 | 322.3 | 0.46       | 0.38   | 0.56  | 174    | 521.0 | 0.31       | 0.27   | 0.37 |
| Past                                     | 1244                         | 250.3 | 4.30       | 4.03   | 4.61  | 443    | 227.5 | 2.29       | 2.07   | 2.54  | 145                 | 254.0 | 0.49       | 0.42   | 0.62  | 56     | 228.7 | 0.34       | 0.26   | 0.46 |
| Current                                  | 365                          | 52.3  | 7.98       | 6.94   | 9.18  | 178    | 57.6  | 4.61       | 3.75   | 5.65  | 34                  | 53.5  | 1.01       | 0.62   | 1.61  | 17     | 58.1  | 0.52       | 0.25   | 1.00 |
| <b>IHD, excluding AMI</b>                |                              |       |            |        |       |        |       |            |        |       |                     |       |            |        |       |        |       |            |        |      |
| Never                                    | 2942                         | 311.7 | 9.02       | 8.67   | 9.39  | 2428   | 512.7 | 4.33       | 4.15   | 4.52  | 136                 | 322.3 | 0.44       | 0.37   | 0.54  | 132    | 521.0 | 0.23       | 0.19   | 0.28 |
| Past                                     | 2956                         | 243.7 | 10.18      | 9.75   | 10.63 | 1034   | 225.1 | 4.89       | 4.57   | 5.24  | 169                 | 254.0 | 0.57       | 0.48   | 0.69  | 44     | 228.7 | 0.28       | 0.20   | 0.39 |
| Current                                  | 606                          | 51.3  | 12.45      | 11.25  | 13.82 | 312    | 57.0  | 6.91       | 5.94   | 8.05  | 42                  | 53.5  | 1.33       | 0.88   | 1.98  | 20     | 58.1  | 0.62       | 0.32   | 1.14 |
| <b>Cerebrovascular disease</b>           |                              |       |            |        |       |        |       |            |        |       |                     |       |            |        |       |        |       |            |        |      |
| Never                                    | 951                          | 319.9 | 3.17       | 2.96   | 3.39  | 1182   | 518.1 | 2.17       | 2.04   | 2.31  | 161                 | 322.3 | 0.58       | 0.50   | 0.69  | 252    | 521.0 | 0.46       | 0.40   | 0.52 |
| Past                                     | 1048                         | 251.3 | 3.53       | 3.31   | 3.78  | 439    | 227.6 | 2.31       | 2.08   | 2.56  | 172                 | 254.0 | 0.60       | 0.51   | 0.73  | 67     | 228.7 | 0.42       | 0.32   | 0.55 |
| Current                                  | 231                          | 52.8  | 6.15       | 5.16   | 7.31  | 140    | 57.7  | 4.00       | 3.18   | 5.01  | 28                  | 53.5  | 1.16       | 0.70   | 1.84  | 17     | 58.1  | 0.74       | 0.38   | 1.32 |
| <b>Heart failure</b>                     |                              |       |            |        |       |        |       |            |        |       |                     |       |            |        |       |        |       |            |        |      |
| Never                                    | 781                          | 320.7 | 2.71       | 2.51   | 2.92  | 1201   | 518.5 | 2.21       | 2.09   | 2.35  | 30                  | 322.3 | 0.11       | 0.07   | 0.17  | 73     | 521.0 | 0.13       | 0.10   | 0.17 |
| Past                                     | 1089                         | 251.6 | 3.74       | 3.52   | 4.00  | 498    | 227.6 | 2.85       | 2.60   | 3.14  | 49                  | 254.0 | 0.17       | 0.12   | 0.27  | 19     | 228.7 | 0.11       | 0.07   | 0.19 |
| Current                                  | 186                          | 53.1  | 5.34       | 4.41   | 6.47  | 119    | 57.8  | 4.67       | 3.69   | 5.85  | <5                  | 53.5  | 0.12       | 0.02   | 0.47  | 5      | 58.1  | 0.31       | 0.09   | 0.77 |
| <b>Peripheral arterial disease</b>       |                              |       |            |        |       |        |       |            |        |       |                     |       |            |        |       |        |       |            |        |      |
| Never                                    | 432                          | 321.0 | 1.39       | 1.25   | 1.54  | 472    | 519.6 | 0.85       | 0.77   | 0.94  | 25                  | 322.3 | 0.09       | 0.06   | 0.15  | 25     | 521.0 | 0.04       | 0.03   | 0.08 |
| Past                                     | 730                          | 251.7 | 2.50       | 2.29   | 2.74  | 285    | 227.8 | 1.47       | 1.29   | 1.68  | 45                  | 254.0 | 0.15       | 0.11   | 0.24  | 18     | 228.7 | 0.11       | 0.07   | 0.20 |
| Current                                  | 254                          | 52.7  | 5.88       | 5.01   | 6.93  | 138    | 57.7  | 4.02       | 3.21   | 5.03  | 15                  | 53.5  | 0.40       | 0.18   | 0.83  | 7      | 58.1  | 0.33       | 0.11   | 0.78 |
| <b>Other major CVD</b>                   |                              |       |            |        |       |        |       |            |        |       |                     |       |            |        |       |        |       |            |        |      |
| Never                                    | 3448                         | 311.6 | 11.19      | 10.79  | 11.61 | 4630   | 506.4 | 8.59       | 8.33   | 8.87  | 107                 | 322.3 | 0.36       | 0.30   | 0.45  | 142    | 521.0 | 0.25       | 0.21   | 0.31 |
| Past                                     | 3476                         | 243.4 | 12.27      | 11.82  | 12.75 | 1878   | 222.8 | 9.47       | 9.00   | 9.96  | 108                 | 254.0 | 0.37       | 0.30   | 0.48  | 41     | 228.7 | 0.24       | 0.17   | 0.34 |
| Current                                  | 562                          | 52.0  | 14.16      | 12.71  | 15.79 | 406    | 57.0  | 10.78      | 9.42   | 12.34 | 17                  | 53.5  | 0.63       | 0.34   | 1.14  | 13     | 58.1  | 0.61       | 0.29   | 1.16 |
| <b>ANY MAJOR CVD</b>                     |                              |       |            |        |       |        |       |            |        |       |                     |       |            |        |       |        |       |            |        |      |
| Never                                    | 6790                         | 299.8 | 23.57      | 22.96  | 24.19 | 8038   | 495.2 | 15.72      | 15.36  | 16.09 | 591                 | 322.3 | 2.04       | 1.88   | 2.23  | 798    | 521.0 | 1.42       | 1.33   | 1.53 |
| Past                                     | 7027                         | 231.0 | 27.10      | 26.39  | 27.84 | 3325   | 218.0 | 17.79      | 17.12  | 18.48 | 688                 | 254.0 | 2.34       | 2.17   | 2.55  | 245    | 228.7 | 1.51       | 1.32   | 1.72 |
| Current                                  | 1437                         | 48.9  | 37.47      | 34.92  | 40.23 | 894    | 55.3  | 24.57      | 22.39  | 26.97 | 139                 | 53.5  | 4.66       | 3.75   | 5.76  | 79     | 58.1  | 3.12       | 2.33   | 4.12 |

\*1,000 person-years. \*\*Age standardised rate per 1000 person-years. Ischaemic heart disease (IHD) (I20-I25); Acute myocardial infarction (I21); IHD, excluding AMI (I20, I22-I25); Cerebrovascular disease (I61-I67 and I69); Heart failure (I50); Peripheral arterial disease (I70-I74); Other major CVD (any major CVD except ischaemic heart disease, cerebrovascular disease, heart failure, and peripheral arterial disease); Any major CVD as defined in: Joshy G et al. Categorising major cardiovascular disease hospitalisations from routinely collected data. *Public Health Research & Practice*. 2015; 25(3): e2531532.

**Table S2: Sensitivity analysis for grouped CVD subtypes, in relation to smoking at baseline, excluding the first year of follow up**

**A. Combined fatal and non-fatal outcomes**

|                                                | Events | Std rate* | RR (95% CI)      |
|------------------------------------------------|--------|-----------|------------------|
| <b>Ischaemic heart disease (IHD)</b>           |        |           |                  |
| Never smoker                                   | 5449   | 7.47      | 1.00             |
| Past smoker                                    | 3983   | 8.47      | 1.17 (1.12-1.22) |
| Current smoker                                 | 928    | 11.91     | 1.66 (1.54-1.78) |
| <b>Acute myocardial infarction (AMI)</b>       |        |           |                  |
| Never                                          | 2039   | 2.74      | 1.00             |
| Past                                           | 1493   | 3.23      | 1.23 (1.15-1.32) |
| Current                                        | 487    | 6.28      | 2.54 (2.29-2.81) |
| <b>IHD, excluding AMI</b>                      |        |           |                  |
| Never                                          | 4725   | 6.45      | 1.00             |
| Past                                           | 3517   | 7.33      | 1.17 (1.12-1.22) |
| Current                                        | 796    | 9.63      | 1.57 (1.45-1.69) |
| <b>Cerebrovascular disease</b>                 |        |           |                  |
| Never smoker                                   | 1896   | 2.56      | 1.00             |
| Past smoker                                    | 1352   | 2.86      | 1.15 (1.07-1.24) |
| Current smoker                                 | 336    | 5.11      | 2.23 (1.98-2.52) |
| <b>Heart failure</b>                           |        |           |                  |
| Never smoker                                   | 1830   | 2.45      | 1.00             |
| Past smoker                                    | 1453   | 3.24      | 1.44 (1.34-1.56) |
| Current smoker                                 | 293    | 5.32      | 2.30 (2.02-2.62) |
| <b>Peripheral arterial disease<sup>‡</sup></b> |        |           |                  |
| Never smoker                                   | 804    | 1.06      | 1.00             |
| Past smoker                                    | 906    | 1.92      | 1.79 (1.62-1.97) |
| Current smoker                                 | 364    | 5.09      | 5.32 (4.67-6.07) |
| <b>Other major CVD</b>                         |        |           |                  |
| Never smoker                                   | 7267   | 9.85      | 1.00             |
| Past smoker                                    | 4804   | 10.94     | 1.09 (1.05-1.14) |
| Current smoker                                 | 873    | 12.57     | 1.25 (1.16-1.34) |
| <b>ANY MAJOR CVD</b>                           |        |           |                  |
| Never smoker                                   | 13032  | 19.11     | 1.00             |
| Past smoker                                    | 9082   | 22.04     | 1.17 (1.13-1.20) |
| Current smoker                                 | 2055   | 30.90     | 1.65 (1.57-1.73) |

\*Age-sex standardised rate per 1000 person-years.

RR (relative risk) adjusted for age, sex, region of residence, alcohol consumption, annual household income, and education attainment; adjustment for sex is through stratification for outcomes IHD, AMI, non-AMI, IHD, heart failure (stratified for income as well) and major CVD. For definitions of outcomes see Additional file 2: Table S1.

**B. Fatal outcomes only**

|                                          | Events | Std rate* | RR (95% CI)      |
|------------------------------------------|--------|-----------|------------------|
| <b>Ischaemic heart disease (IHD)</b>     |        |           |                  |
| Never smoker                             | 535    | 0.71      | 1.00             |
| Past smoker                              | 381    | 0.82      | 1.25 (1.08-1.44) |
| Current smoker                           | 99     | 1.73      | 2.93 (2.34-3.67) |
| <b>Acute myocardial infarction (AMI)</b> |        |           |                  |
| Never                                    | 283    | 0.38      | 1.00             |
| Past                                     | 177    | 0.39      | 1.11 (0.91-1.36) |
| Current                                  | 45     | 0.74      | 2.72 (1.96-3.79) |
| <b>IHD, excluding AMI</b>                |        |           |                  |
| Never                                    | 252    | 0.33      | 1.00             |
| Past                                     | 204    | 0.42      | 1.34 (1.10-1.63) |
| Current                                  | 54     | 0.99      | 3.15 (2.31-4.29) |
| <b>Cerebrovascular disease</b>           |        |           |                  |
| Never smoker                             | 396    | 0.52      | 1.00             |
| Past smoker                              | 233    | 0.53      | 1.04 (0.87-1.23) |
| Current smoker                           | 44     | 0.95      | 2.31 (1.68-3.18) |
| <b>ANY MAJOR CVD</b>                     |        |           |                  |
| Never smoker                             | 1311   | 1.72      | 1.00             |
| Past smoker                              | 880    | 1.91      | 1.20 (1.10-1.32) |
| Current smoker                           | 199    | 4.05      | 2.68 (2.29-3.13) |

\*Age-sex standardised rate per 1000 person-years.

RR (relative risk) adjusted for age, sex, region of residence, alcohol consumption, annual household income, and education attainment; adjustment for sex is through stratification for outcomes IHD and major CVD. For definitions of outcomes see Additional file 2: Table S1.

**Table S3. Sensitivity analysis for combined fatal and non-fatal CVD outcomes, re-classifying past smokers who stopped smoking three or fewer years prior to baseline as current smokers.**

|                                                | Events | Std rate* | RR (95% CI)      |
|------------------------------------------------|--------|-----------|------------------|
| <b>Ischaemic heart disease (IHD)</b>           |        |           |                  |
| Never smoker                                   | 6192   | 7.57      | 1.00             |
| Past smoker                                    | 4229   | 8.39      | 1.13 (1.09-1.18) |
| Current smoker                                 | 1357   | 11.52     | 1.65 (1.55-1.75) |
| <b>Acute myocardial infarction (AMI)</b>       |        |           |                  |
| Never                                          | 2318   | 2.84      | 1.00             |
| Past                                           | 1575   | 3.16      | 1.18 (1.10-1.26) |
| Current                                        | 655    | 5.78      | 2.33 (2.13-2.55) |
| <b>IHD, excluding AMI</b>                      |        |           |                  |
| Never                                          | 5370   | 6.51      | 1.00             |
| Past                                           | 3728   | 7.26      | 1.13 (1.09-1.18) |
| Current                                        | 1180   | 9.40      | 1.58 (1.48-1.68) |
| <b>Cerebrovascular disease</b>                 |        |           |                  |
| Never smoker                                   | 2133   | 2.58      | 1.00             |
| Past smoker                                    | 1395   | 2.77      | 1.09 (1.01-1.17) |
| Current smoker                                 | 463    | 4.79      | 2.15 (1.93-2.39) |
| <b>Heart failure</b>                           |        |           |                  |
| Never smoker                                   | 1982   | 2.41      | 1.00             |
| Past smoker                                    | 1492   | 3.16      | 1.42 (1.32-1.52) |
| Current smoker                                 | 400    | 5.17      | 2.37 (2.12-2.66) |
| <b>Peripheral arterial disease<sup>‡</sup></b> |        |           |                  |
| Never smoker                                   | 904    | 1.08      | 1.00             |
| Past smoker                                    | 947    | 1.87      | 1.72 (1.57-1.90) |
| Current smoker                                 | 460    | 4.63      | 4.71 (4.18-5.30) |
| <b>Other major CVD</b>                         |        |           |                  |
| Never smoker                                   | 8078   | 9.76      | 1.00             |
| Past smoker                                    | 5075   | 10.67     | 1.09 (1.05-1.13) |
| Current smoker                                 | 1247   | 12.21     | 1.26 (1.19-1.34) |
| <b>ANY MAJOR CVD</b>                           |        |           |                  |
| Never smoker                                   | 14828  | 19.26     | 1.00             |
| Past smoker                                    | 9718   | 21.72     | 1.14 (1.11-1.17) |
| Current smoker                                 | 2965   | 30.10     | 1.63 (1.57-1.70) |

\*Age-sex standardised rate per 1000 person-years.

RR (relative risk) adjusted for age, sex, region of residence, alcohol consumption, annual household income, and education attainment; adjustment for sex is through stratification for outcomes IHD, AMI, non-AMI, IHD, heart failure (stratified for income as well) and major CVD. For definitions of outcomes see Additional file 2: Table S1.

**Table S4: Non-fatal outcomes for selected CVD subtypes in relation to smoking status at baseline**

|                                                | Events | Std rate* | RR (95% CI)      |
|------------------------------------------------|--------|-----------|------------------|
| <b>Ischaemic heart disease (IHD)</b>           |        |           |                  |
| Never smoker                                   | 5886   | 7.17      | 1.00             |
| Past smoker                                    | 4281   | 8.03      | 1.15 (1.10-1.19) |
| Current smoker                                 | 990    | 10.74     | 1.56 (1.45-1.67) |
| <b>Acute myocardial infarction (AMI)</b>       |        |           |                  |
| Never                                          | 2144   | 2.62      | 1.00             |
| Past                                           | 1564   | 2.96      | 1.20 (1.12-1.29) |
| Current                                        | 508    | 5.74      | 2.41 (2.17-2.66) |
| <b>IHD, excluding AMI</b>                      |        |           |                  |
| Never                                          | 5190   | 6.28      | 1.00             |
| Past                                           | 3842   | 7.08      | 1.15 (1.10-1.20) |
| Current                                        | 874    | 8.87      | 1.53 (1.42-1.65) |
| <b>Cerebrovascular disease</b>                 |        |           |                  |
| Never smoker                                   | 1988   | 2.40      | 1.00             |
| Past smoker                                    | 1402   | 2.63      | 1.12 (1.05-1.21) |
| Current smoker                                 | 359    | 4.66      | 2.16 (1.93-2.43) |
| <b>Heart failure</b>                           |        |           |                  |
| Never smoker                                   | 1941   | 2.37      | 1.00             |
| Past smoker                                    | 1562   | 3.19      | 1.47 (1.37-1.58) |
| Current smoker                                 | 302    | 4.92      | 2.24 (1.97-2.55) |
| <b>Peripheral arterial disease<sup>‡</sup></b> |        |           |                  |
| Never smoker                                   | 887    | 1.06      | 1.00             |
| Past smoker                                    | 991    | 1.87      | 1.77 (1.61-1.95) |
| Current smoker                                 | 384    | 4.80      | 5.03 (4.44-5.71) |
| <b>Other major CVD</b>                         |        |           |                  |
| Never smoker                                   | 7944   | 9.58      | 1.00             |
| Past smoker                                    | 5276   | 10.57     | 1.10 (1.06-1.14) |
| Current smoker                                 | 948    | 11.91     | 1.24 (1.15-1.32) |
| <b>ANY MAJOR CVD</b>                           |        |           |                  |
| Never smoker                                   | 14442  | 18.70     | 1.00             |
| Past smoker                                    | 10082  | 21.38     | 1.16 (1.13-1.19) |
| Current smoker                                 | 2247   | 29.05     | 1.60 (1.53-1.68) |

\*Age-sex standardised rate per 1000 person-years.

RR (relative risk) adjusted for age, sex, region of residence, alcohol consumption, annual household income, and education attainment; adjustment for sex is through stratification for outcomes IHD (stratified for education as well), AMI, non-AMI, IHD, heart failure (stratified for income as well) and major CVD. For definitions of outcomes see Additional file 2: Table S1.

**Table S5. CVD subtypes (level 3 ICD-10 AM codes) ranked according to frequency of fatal and non-fatal outcomes**

| Non-fatal outcomes                                                                       |              |      | Fatal outcomes                                                  |             |      |
|------------------------------------------------------------------------------------------|--------------|------|-----------------------------------------------------------------|-------------|------|
| ICD-10-AM codes                                                                          | Number       | %*   | ICD-10-AM codes                                                 | Number      | %*   |
| I48 Atrial fibrillation and flutter                                                      | 8537         | 31.9 | I21 Acute myocardial infarction                                 | 558         | 22.0 |
| I25 Chronic ischaemic heart disease                                                      | 8442         | 31.5 | I25 Chronic ischaemic heart disease                             | 530         | 20.9 |
| I21 Acute myocardial infarction                                                          | 4216         | 15.7 | I64 Stroke, not specified as haemorrhage or infarction          | 297         | 11.7 |
| I20 Angina pectoris                                                                      | 4212         | 15.7 | I50 Heart failure                                               | 179         | 7.0  |
| I50 Heart failure                                                                        | 3805         | 14.2 | I69 Sequelae of cerebrovascular disease                         | 118         | 4.6  |
| G45 Transient cerebral ischaemic attacks and related syndromes                           | 1989         | 7.4  | I61 Intracerebral haemorrhage                                   | 103         | 4.1  |
| I80 Phlebitis and thrombophlebitis                                                       | 1860         | 6.9  | I48 Atrial fibrillation and flutter                             | 95          | 3.7  |
| I63 Cerebral infarction                                                                  | 1709         | 6.4  | I71 Aortic aneurysm and dissection                              | 91          | 3.6  |
| I26 Pulmonary embolism                                                                   | 1629         | 6.1  | I62 Other nontraumatic intracranial haemorrhage                 | 76          | 3.0  |
| I47 Paroxysmal tachycardia                                                               | 1588         | 5.9  | I63 Cerebral infarction                                         | 73          | 2.9  |
| I44 Atrioventricular and left bundle-branch block                                        | 1537         | 5.7  | I35 Nonrheumatic aortic valve disorders                         | 65          | 2.6  |
| I49 Other cardiac arrhythmias                                                            | 1532         | 5.7  | I11 Hypertensive heart disease                                  | 48          | 1.9  |
| I70 Atherosclerosis                                                                      | 1299         | 4.9  | I51 Complications and ill-defined descriptions of heart disease | 32          | 1.3  |
| I35 Nonrheumatic aortic valve disorders                                                  | 1108         | 4.1  | I26 Pulmonary embolism                                          | 31          | 1.2  |
| I51 Complications and ill-defined descriptions of heart disease                          | 968          | 3.6  | I67 Other cerebrovascular diseases                              | 30          | 1.2  |
| I64 Stroke, not specified as haemorrhage or infarction                                   | 845          | 3.2  | I12 Hypertensive kidney disease                                 | 29          | 1.1  |
| I27 Other pulmonary heart diseases                                                       | 787          | 2.9  | I73 Other peripheral vascular diseases                          | 29          | 1.1  |
| I42 Cardiomyopathy                                                                       | 665          | 2.5  | I42 Cardiomyopathy                                              | 27          | 1.1  |
| I71 Aortic aneurysm and dissection                                                       | 655          | 2.4  | I46 Cardiac arrest                                              | 21          | 0.8  |
| I34 Nonrheumatic mitral valve disorders                                                  | 644          | 2.4  | I49 Other cardiac arrhythmias                                   | 19          | 0.7  |
| I65 Occlusion and stenosis of precerebral arteries, not resulting in cerebral infarction | 575          | 2.1  | I27 Other pulmonary heart diseases                              | 16          | 0.6  |
| I46 Cardiac arrest                                                                       | 551          | 2.1  | I24 Other acute ischaemic heart diseases                        | 13          | 0.5  |
| I61 Intracerebral haemorrhage                                                            | 513          | 1.9  | I34 Nonrheumatic mitral valve disorders                         | 13          | 0.5  |
| I67 Other cerebrovascular diseases                                                       | 414          | 1.5  | I80 Phlebitis and thrombophlebitis                              | 12          | 0.5  |
| I69 Sequelae of cerebrovascular disease                                                  | 403          | 1.5  | I70 Atherosclerosis                                             | 9           | 0.4  |
| I62 Other nontraumatic intracranial haemorrhage                                          | 307          | 1.1  | I77 Other disorders of arteries and arterioles                  | 8           | 0.3  |
| I72 Other aneurysm and dissection                                                        | 300          | 1.1  | I13 Hypertensive heart and kidney disease                       | 7           | 0.3  |
| I77 Other disorders of arteries and arterioles                                           | 287          | 1.1  | I72 Other aneurysm and dissection                               | <5          | <0.2 |
| I74 Arterial embolism and thrombosis                                                     | 230          | 0.9  | I74 Arterial embolism and thrombosis                            | <5          | <0.2 |
| I12 Hypertensive kidney disease                                                          | 122          | 0.5  | I44 Atrioventricular and left bundle-branch block               | <5          | <0.2 |
| I24 Other acute ischaemic heart diseases                                                 | 122          | 0.5  | G45 Transient cerebral ischaemic attacks and related syndromes  | <5          | <0.2 |
| I66 Occlusion and stenosis of cerebral arteries, not resulting in cerebral infarction    | 119          | 0.4  | I47 Paroxysmal tachycardia                                      | <5          | <0.2 |
| I73 Other peripheral vascular diseases                                                   | 103          | 0.4  | <b>Total number of people with fatal major CVD outcomes</b>     | <b>2540</b> |      |
| I11 Hypertensive heart disease                                                           | 73           | 0.3  |                                                                 |             |      |
| I23 Certain current complications following acute myocardial, infarction                 | 33           | 0.1  |                                                                 |             |      |
| I22 Subsequent myocardial infarction                                                     | 26           | <0.1 |                                                                 |             |      |
| I13 Hypertensive heart and kidney disease                                                | 19           | <0.1 |                                                                 |             |      |
| I36 Nonrheumatic tricuspid valve disorders                                               | 17           | <0.1 |                                                                 |             |      |
| G46 Cardiac arrest                                                                       | 13           | <0.1 |                                                                 |             |      |
| I28 Other diseases of pulmonary vessels                                                  | 6            | <0.1 |                                                                 |             |      |
| <b>Total number of people with non-fatal major CVD outcomes</b>                          | <b>26771</b> |      |                                                                 |             |      |

\*Percentages are the proportion of people with either non-fatal or fatal outcomes experiencing the specific CVD subtype. Percentages of non-fatal outcomes do not add up to 100% because they are not mutually exclusive. I10 [Essential (primary) hypertension] and K55 [Vascular disorders of intestine] are not included in this table as they are not part of “any major CVD”. Counting these in (combining major CVD, I10 and K55), there were 34,791 people with non-fatal outcomes including 19,114 hospitalisations for I10 and 641 for K55. Similarly, there were 2,610 people with fatal outcomes including 44 deaths from I10 and 26 from K55.



**Table S6: Outcomes for specific CVD subtypes (level 3 ICD-10-AM codes) with at least 50 events, in current and past smokers versus never smokers**

**A. Combined fatal and non-fatal outcomes**

| ICD-10-AM codes                                                                          | Events  |      |       | Std rate* |       |       | Current vs Never | Past vs Never    |
|------------------------------------------------------------------------------------------|---------|------|-------|-----------|-------|-------|------------------|------------------|
|                                                                                          | Current | Past | Never | Current   | Past  | Never | RR (95% CI)      | RR (95% CI)      |
| I70 Atherosclerosis                                                                      | 253     | 587  | 465   | 3.00      | 1.10  | 0.56  | 6.60 (5.61-7.76) | 2.02 (1.78-2.30) |
| I71 Aortic aneurysm and dissection                                                       | 122     | 320  | 240   | 1.74      | 0.55  | 0.29  | 5.92 (4.71-7.45) | 1.91 (1.60-2.27) |
| I74 Arterial embolism and thrombosis                                                     | 41      | 93   | 99    | 0.40      | 0.17  | 0.12  | 4.12 (2.80-6.05) | 1.46 (1.08-1.96) |
| I65 Occlusion and stenosis of precerebral arteries, not resulting in cerebral infarction | 84      | 259  | 232   | 1.00      | 0.45  | 0.28  | 3.76 (2.90-4.88) | 1.54 (1.28-1.86) |
| I72 Other aneurysm and dissection                                                        | 45      | 120  | 138   | 0.47      | 0.25  | 0.16  | 3.25 (2.29-4.63) | 1.41 (1.10-1.83) |
| I69 Sequelae of cerebrovascular disease                                                  | 48      | 196  | 264   | 0.73      | 0.37  | 0.31  | 2.76 (2.01-3.81) | 1.25 (1.03-1.53) |
| I67 Other cerebrovascular diseases                                                       | 51      | 165  | 223   | 0.59      | 0.32  | 0.26  | 2.69 (1.96-3.70) | 1.36 (1.10-1.68) |
| I73 Other peripheral vascular diseases                                                   | 14      | 48   | 70    | 0.24      | 0.10  | 0.08  | 2.55 (1.40-4.64) | 1.19 (0.81-1.75) |
| I21 Acute myocardial infarction                                                          | 543     | 1687 | 2318  | 6.20      | 3.22  | 2.84  | 2.45 (2.22-2.70) | 1.21 (1.13-1.29) |
| I27 Other pulmonary heart diseases                                                       | 72      | 342  | 378   | 1.05      | 0.69  | 0.46  | 2.43 (1.87-3.16) | 1.61 (1.37-1.87) |
| I46 Cardiac arrest                                                                       | 69      | 210  | 288   | 0.80      | 0.37  | 0.35  | 2.39 (1.81-3.15) | 1.12 (0.93-1.35) |
| I24 Other acute ischaemic heart diseases                                                 | 18      | 51   | 66    | 0.20      | 0.10  | 0.08  | 2.33 (1.35-4.01) | 1.17 (0.80-1.72) |
| I50 Heart failure                                                                        | 305     | 1587 | 1982  | 5.05      | 3.24  | 2.41  | 2.23 (1.96-2.53) | 1.46 (1.36-1.57) |
| I77 Other disorders of arteries and arterioles                                           | 31      | 120  | 140   | 0.35      | 0.21  | 0.15  | 2.16 (1.44-3.23) | 1.50 (1.16-1.94) |
| K55 Vascular disorders of intestine                                                      | 62      | 261  | 325   | 0.79      | 0.56  | 0.37  | 2.07 (1.56-2.74) | 1.42 (1.19-1.68) |
| I63 Cerebral infarction                                                                  | 157     | 630  | 944   | 1.89      | 1.17  | 1.14  | 2.01 (1.69-2.40) | 1.02 (0.92-1.14) |
| I42 Cardiomyopathy                                                                       | 78      | 255  | 348   | 0.75      | 0.45  | 0.40  | 1.88 (1.46-2.43) | 1.10 (0.93-1.30) |
| I62 Other nontraumatic intracranial haemorrhage                                          | 27      | 145  | 190   | 0.30      | 0.27  | 0.22  | 1.87 (1.24-2.84) | 1.20 (0.95-1.50) |
| I61 Intracerebral haemorrhage                                                            | 45      | 185  | 311   | 0.56      | 0.36  | 0.36  | 1.84 (1.33-2.54) | 0.96 (0.79-1.17) |
| I64 Stroke, not specified as haemorrhage or infarction                                   | 75      | 388  | 601   | 1.08      | 0.76  | 0.73  | 1.70 (1.33-2.18) | 1.05 (0.91-1.20) |
| I12 Hypertensive kidney disease                                                          | 10      | 51   | 85    | 0.22      | 0.09  | 0.10  | 1.63 (0.83-3.20) | 1.06 (0.73-1.53) |
| I51 Complications and ill-defined descriptions of heart disease                          | 85      | 391  | 523   | 1.00      | 0.69  | 0.61  | 1.62 (1.28-2.06) | 1.12 (0.98-1.28) |
| I25 Chronic ischaemic heart disease                                                      | 785     | 3497 | 4541  | 8.01      | 6.30  | 5.53  | 1.60 (1.48-1.73) | 1.16 (1.11-1.22) |
| I11 Hypertensive heart disease                                                           | 9       | 43   | 69    | 0.16      | 0.08  | 0.08  | 1.59 (0.77-3.26) | 1.10 (0.73-1.64) |
| I47 Paroxysmal tachycardia                                                               | 136     | 601  | 851   | 1.58      | 1.13  | 0.97  | 1.50 (1.24-1.80) | 1.15 (1.03-1.29) |
| I26 Pulmonary embolism                                                                   | 132     | 581  | 928   | 1.51      | 1.09  | 1.04  | 1.41 (1.17-1.70) | 1.09 (0.98-1.22) |
| I20 Angina pectoris                                                                      | 346     | 1612 | 2254  | 3.41      | 2.93  | 2.63  | 1.36 (1.21-1.52) | 1.13 (1.06-1.21) |
| I10 Essential (primary) hypertension                                                     | 1445    | 7234 | 10465 | 17.72     | 15.32 | 13.11 | 1.34 (1.27-1.42) | 1.19 (1.16-1.23) |
| I48 Atrial fibrillation and flutter                                                      | 538     | 3318 | 4700  | 7.41      | 6.45  | 5.69  | 1.31 (1.20-1.44) | 1.13 (1.08-1.18) |
| G45 Transient cerebral ischaemic attacks and related                                     | 133     | 727  | 1130  | 1.88      | 1.45  | 1.28  | 1.31 (1.09-1.58) | 1.09 (0.99-1.20) |
| I66 Occlusion and stenosis of cerebral arteries, not resulting in cerebral infarction    | 7       | 42   | 70    | 0.12      | 0.06  | 0.09  | 1.28 (0.58-2.83) | 0.87 (0.58-1.29) |
| I80 Phlebitis and thrombophlebitis                                                       | 136     | 690  | 1042  | 1.51      | 1.33  | 1.18  | 1.28 (1.07-1.54) | 1.14 (1.03-1.26) |
| I35 Nonrheumatic aortic valve disorders                                                  | 63      | 452  | 615   | 0.87      | 0.81  | 0.75  | 1.25 (0.96-1.63) | 1.07 (0.94-1.22) |
| I49 Other cardiac arrhythmias                                                            | 97      | 574  | 873   | 1.07      | 1.01  | 1.01  | 1.19 (0.96-1.48) | 0.99 (0.89-1.11) |
| I44 Atrioventricular and left bundle-branch block                                        | 78      | 560  | 899   | 1.07      | 1.01  | 1.08  | 1.03 (0.82-1.31) | 0.93 (0.83-1.04) |
| I34 Nonrheumatic mitral valve disorders                                                  | 32      | 237  | 382   | 0.31      | 0.45  | 0.45  | 0.83 (0.57-1.19) | 0.94 (0.79-1.11) |

\*Age-sex standardised rate per 1000 person-years. RR (relative risk) adjusted for age, sex, region of residence, alcohol consumption, annual household income, and education attainment; adjustment for sex is through stratification for outcomes I21, I25, I48, I50, I10, I50 (stratified for income as well) and I10 (stratified for alcohol and income as well). I10 and K55 are not part of “any major CVD” but were included due to their relevance as outcomes related to any major CVD.

## B. Fatal outcomes only

| ICD-10-AM codes                                        | Events  |      |       | Std rate* |      |       | Current vs Never  | Past vs Never    |
|--------------------------------------------------------|---------|------|-------|-----------|------|-------|-------------------|------------------|
|                                                        | Current | Past | Never | Current   | Past | Never | RR (95% CI)       | RR (95% CI)      |
| I71 Aortic aneurysm and dissection                     | 17      | 46   | 28    | 0.28      | 0.10 | 0.03  | 8.47 (4.46-16.12) | 2.74 (1.66-4.51) |
| I62 Other nontraumatic intracranial haemorrhage        | 9       | 24   | 43    | 0.09      | 0.05 | 0.05  | 3.28 (1.55-6.96)  | 0.90 (0.53-1.52) |
| I25 Chronic ischaemic heart disease                    | 59      | 206  | 265   | 0.86      | 0.38 | 0.32  | 3.22 (2.39-4.33)  | 1.26 (1.04-1.53) |
| I21 Acute myocardial infarction                        | 51      | 201  | 306   | 0.73      | 0.40 | 0.37  | 2.79 (2.04-3.80)  | 1.16 (0.96-1.41) |
| I69 Sequelae of cerebrovascular disease                | 6       | 45   | 67    | 0.17      | 0.10 | 0.08  | 2.43 (1.04-5.71)  | 1.36 (0.91-2.05) |
| I61 Intracerebral haemorrhage                          | 8       | 34   | 61    | 0.15      | 0.07 | 0.07  | 2.22 (1.04-4.76)  | 0.99 (0.64-1.56) |
| I63 Cerebral infarction                                | 6       | 20   | 47    | 0.12      | 0.04 | 0.06  | 2.19 (0.91-5.26)  | 0.72 (0.41-1.25) |
| I50 Heart failure                                      | 8       | 68   | 103   | 0.25      | 0.13 | 0.12  | 1.79 (0.86-3.75)  | 1.38 (0.99-1.92) |
| I48 Atrial fibrillation and flutter                    | <5      | 34   | 57    | 0.14      | 0.08 | 0.07  | 1.79 (0.64-5.01)  | 1.20 (0.76-1.91) |
| I64 Stroke, not specified as haemorrhage or infarction | 13      | 101  | 183   | 0.28      | 0.21 | 0.22  | 1.59 (0.90-2.81)  | 0.98 (0.75-1.27) |
| I35 Nonrheumatic aortic valve disorders                | <5      | 24   | 38    | 0.06      | 0.04 | 0.05  | 1.53 (0.46-5.12)  | 0.98 (0.56-1.69) |

\*Age-sex standardised rate per 1000 person-years.

RR (relative risk) adjusted for age, sex, region of residence, alcohol consumption, annual household income, and education attainment.

I10 and K55 are not part of “any major CVD” but were included due to their relevance as outcomes related to any major CVD.

**Table S7. Smoking attributable fractions for CVD mortality and hospitalisation for acute coronary syndrome in Australia, using 2004-5 smoking prevalence estimates**

|                                                          | Age (years) | Observed rate in Australia per 100,000 | Prevalence of current smoking in Australia, $p_{cs}$ | Prevalence of former smoking in Australia, $p_{fs}$ | Relative risk for current smokers, $RR_{cs}$ (95%CI) | Relative risk for former smokers, $RR_{fs}$ (95% CI) | Smoking Attributable Fraction | Smoking attributable rate per 100,000 | Attributable events |
|----------------------------------------------------------|-------------|----------------------------------------|------------------------------------------------------|-----------------------------------------------------|------------------------------------------------------|------------------------------------------------------|-------------------------------|---------------------------------------|---------------------|
| <b>CVD mortality</b>                                     |             |                                        |                                                      |                                                     |                                                      |                                                      |                               |                                       |                     |
| Males                                                    | 45-54       | 63                                     | 26.7                                                 | 37.3                                                | 3.47 (2.76-4.37)                                     | 1.28 (1.05-1.57)                                     | <b>43.4</b>                   | 27.5                                  | <b>419</b>          |
|                                                          | 55-64       | 142                                    | 20.2                                                 | 47.3                                                | 3.47 (2.76-4.37)                                     | 1.28 (1.05-1.57)                                     | <b>38.8</b>                   | 54.9                                  | <b>715</b>          |
|                                                          | 65-74       | 368                                    | 11.3                                                 | 59.9                                                | 3.47 (2.76-4.37)                                     | 1.28 (1.05-1.57)                                     | <b>31.0</b>                   | 113.9                                 | <b>1048</b>         |
|                                                          | ≥75         | 2299                                   | 5.5                                                  | 68.2                                                | 2.12 (1.70-2.63)                                     | 1.18 (1.06-1.30)                                     | <b>15.3</b>                   | 352.0                                 | <b>2208</b>         |
| Females                                                  | 45-54       | 22                                     | 21.3                                                 | 29.0                                                | 3.47 (2.76-4.37)                                     | 1.28 (1.05-1.57)                                     | <b>37.8</b>                   | 8.4                                   | <b>131</b>          |
|                                                          | 55-64       | 52                                     | 14.2                                                 | 30.0                                                | 3.47 (2.76-4.37)                                     | 1.28 (1.05-1.57)                                     | <b>30.4</b>                   | 15.8                                  | <b>210</b>          |
|                                                          | 65-74       | 155                                    | 8.4                                                  | 29.3                                                | 3.47 (2.76-4.37)                                     | 1.28 (1.05-1.57)                                     | <b>22.5</b>                   | 34.9                                  | <b>329</b>          |
|                                                          | ≥75         | 2273                                   | 4.0                                                  | 26.6                                                | 2.12 (1.70-2.63)                                     | 1.18 (1.06-1.30)                                     | <b>8.4</b>                    | 190.0                                 | <b>1610</b>         |
| Total                                                    |             |                                        |                                                      |                                                     |                                                      | <b>15.6</b>                                          |                               | <b>6671</b>                           |                     |
| <b>Fatal and non-fatal acute coronary syndrome (ACS)</b> |             |                                        |                                                      |                                                     |                                                      |                                                      |                               |                                       |                     |
| Males                                                    | 45-54       | 386                                    | 26.7                                                 | 37.3                                                | 2.65 (2.36-2.97)                                     | 1.19 (1.08-1.30)                                     | <b>33.8</b>                   | 130.3                                 | <b>1985</b>         |
|                                                          | 55-64       | 717                                    | 20.2                                                 | 47.3                                                | 2.65 (2.36-2.97)                                     | 1.19 (1.08-1.30)                                     | <b>29.7</b>                   | 212.9                                 | <b>2774</b>         |
|                                                          | 65-74       | 1127                                   | 11.3                                                 | 59.9                                                | 2.65 (2.36-2.97)                                     | 1.19 (1.08-1.30)                                     | <b>23.0</b>                   | 259.7                                 | <b>2389</b>         |
|                                                          | 75-84       | 1861                                   | 5.5                                                  | 68.2                                                | 1.76 (1.42-2.19)                                     | 1.19 (1.08-1.31)                                     | <b>14.6</b>                   | 271.5                                 | <b>1281</b>         |
|                                                          | ≥85         | 3315                                   | 5.5                                                  | 68.2                                                | 1.76 (1.42-2.19)                                     | 1.19 (1.08-1.31)                                     | <b>14.6</b>                   | 483.7                                 | <b>751</b>          |
| Females                                                  | 45-54       | 125                                    | 21.3                                                 | 29.0                                                | 2.65 (2.36-2.97)                                     | 1.19 (1.08-1.30)                                     | <b>28.9</b>                   | 36.1                                  | <b>562</b>          |
|                                                          | 55-64       | 246                                    | 14.2                                                 | 30.0                                                | 2.65 (2.36-2.97)                                     | 1.19 (1.08-1.30)                                     | <b>22.5</b>                   | 55.4                                  | <b>738</b>          |
|                                                          | 65-74       | 489                                    | 8.4                                                  | 29.3                                                | 2.65 (2.36-2.97)                                     | 1.19 (1.08-1.30)                                     | <b>16.2</b>                   | 79.3                                  | <b>748</b>          |
|                                                          | 75-84       | 1099                                   | 4.0                                                  | 26.6                                                | 1.76 (1.42-2.19)                                     | 1.19 (1.08-1.31)                                     | <b>7.5</b>                    | 82.1                                  | <b>464</b>          |
|                                                          | ≥85         | 2436                                   | 4.0                                                  | 26.6                                                | 1.76 (1.42-2.19)                                     | 1.19 (1.08-1.31)                                     | <b>7.5</b>                    | 182.0                                 | <b>513</b>          |
| Total                                                    |             |                                        |                                                      |                                                     |                                                      | <b>19.5</b>                                          |                               | <b>12206</b>                          |                     |

Smoking prevalence estimates are from the Australian Health Survey 2004-5.

Observed rates of CVD mortality are those for all circulatory diseases (rather than any major CVD) in the Australian population, obtained from: Australian Institute of Health and Welfare. General Record of Incidence of Mortality (GRIM) books, 2018.

Observed acute coronary syndrome hospitalisations are from national data on hospitalisations for acute myocardial infarction (AMI) or unstable angina, obtained from: Australian Institute of Health and Welfare. Australia's Health 2016. Canberra: AIHW, 2016.

$RR_{cs}$  and  $RR_{fs}$  used for CVD mortality are the broad age-group specific relative risks for mortality from major CVD among current and former smokers, respectively, relative to never smokers.  $RR_{cs}$  and  $RR_{fs}$  used for acute coronary syndrome are the broad age-group specific relative risks for fatal and non-fatal AMI among current and former smokers, respectively, relative to never smokers.

**Table S8. Selected grouped CVD subtypes in relation to smoking status at baseline by sex**

**A. Combined fatal and non-fatal outcomes**

|                                                | Men    |           |                  | Women  |           |                  | p <sub>interaction</sub> |
|------------------------------------------------|--------|-----------|------------------|--------|-----------|------------------|--------------------------|
|                                                | Events | Std rate* | RR (95% CI)      | Events | Std rate* | RR (95% CI)      |                          |
| <b>Ischaemic heart disease (IHD)</b>           |        |           |                  |        |           |                  |                          |
| Never smoker                                   | 3284   | 10.28     | 1.00             | 2908   | 5.25      | 1.00             | 0.02                     |
| Past smoker                                    | 3313   | 11.55     | 1.15 (1.09-1.21) | 1208   | 5.87      | 1.18 (1.10-1.26) |                          |
| Current smoker                                 | 691    | 14.83     | 1.56 (1.43-1.70) | 374    | 9.02      | 1.86 (1.66-2.07) |                          |
| <b>Acute myocardial infarction (AMI)</b>       |        |           |                  |        |           |                  |                          |
| Never smoker                                   | 1231   | 3.87      | 1.00             | 1087   | 1.96      | 1.00             | 0.02                     |
| Past smoker                                    | 1244   | 4.30      | 1.15 (1.06-1.25) | 443    | 2.29      | 1.31 (1.16-1.46) |                          |
| Current smoker                                 | 365    | 7.98      | 2.26 (2.00-2.55) | 178    | 4.61      | 2.87 (2.43-3.39) |                          |
| <b>IHD, excluding AMI</b>                      |        |           |                  |        |           |                  |                          |
| Never smoker                                   | 2942   | 9.02      | 1.00             | 2428   | 4.33      | 1.00             | 0.04                     |
| Past smoker                                    | 2956   | 10.18     | 1.15 (1.09-1.21) | 1034   | 4.89      | 1.17 (1.09-1.26) |                          |
| Current smoker                                 | 606    | 12.45     | 1.49 (1.36-1.63) | 312    | 6.91      | 1.76 (1.56-1.99) |                          |
| <b>Cerebrovascular disease</b>                 |        |           |                  |        |           |                  |                          |
| Never smoker                                   | 951    | 3.17      | 1.00             | 1182   | 2.17      | 1.00             | 0.9                      |
| Past smoker                                    | 1048   | 3.53      | 1.14 (1.04-1.25) | 439    | 2.31      | 1.12 (1.00-1.25) |                          |
| Current smoker                                 | 231    | 6.15      | 2.20 (1.89-2.55) | 140    | 4.00      | 2.12 (1.77-2.54) |                          |
| <b>Heart failure</b>                           |        |           |                  |        |           |                  |                          |
| Never smoker                                   | 781    | 2.71      | 1.00             | 1201   | 2.21      | 1.00             | 0.9                      |
| Past smoker                                    | 1089   | 3.74      | 1.44 (1.31-1.59) | 498    | 2.85      | 1.50 (1.34-1.67) |                          |
| Current smoker                                 | 186    | 5.34      | 2.16 (1.83-2.55) | 119    | 4.67      | 2.33 (1.92-2.83) |                          |
| <b>Peripheral arterial disease<sup>‡</sup></b> |        |           |                  |        |           |                  |                          |
| Never smoker                                   | 432    | 1.39      | 1.00             | 472    | 0.85      | 1.00             | 0.9                      |
| Past smoker                                    | 730    | 2.50      | 1.79 (1.58-2.02) | 285    | 1.47      | 1.84 (1.58-2.14) |                          |
| Current smoker                                 | 254    | 5.88      | 5.07 (4.32-5.96) | 138    | 4.02      | 5.17 (4.23-6.31) |                          |
| <b>Other major CVD</b>                         |        |           |                  |        |           |                  |                          |
| Never smoker                                   | 3448   | 11.19     | 1.00             | 4630   | 8.59      | 1.00             | 0.8                      |
| Past smoker                                    | 3476   | 12.27     | 1.08 (1.03-1.14) | 1878   | 9.47      | 1.13 (1.07-1.19) |                          |
| Current smoker                                 | 562    | 14.16     | 1.24 (1.13-1.36) | 406    | 10.78     | 1.26 (1.14-1.40) |                          |
| <b>ANY MAJOR CVD</b>                           |        |           |                  |        |           |                  |                          |
| Never smoker                                   | 6790   | 23.57     | 1.00             | 8038   | 15.72     | 1.00             | 0.9                      |
| Past smoker                                    | 7027   | 27.10     | 1.15 (1.12-1.20) | 3325   | 17.79     | 1.18 (1.13-1.23) |                          |
| Current smoker                                 | 1437   | 37.47     | 1.63 (1.54-1.73) | 894    | 24.57     | 1.64 (1.53-1.76) |                          |

\*Age standardised rate per 1000 person-years.

RR (relative risk) adjusted for age, region of residence, alcohol consumption, annual household income, and education attainment; for the heart failure outcome adjustment for income is through stratification, in both men and women. For definitions of outcomes see Additional file 2: Table S1.

## B. Fatal events only

|                                          | Men    |           |                  | Women  |           |                  | p <sub>interaction</sub> |
|------------------------------------------|--------|-----------|------------------|--------|-----------|------------------|--------------------------|
|                                          | Events | Std rate* | RR (95% CI)      | Events | Std rate* | RR (95% CI)      |                          |
| <b>Ischaemic heart disease (IHD)</b>     |        |           |                  |        |           |                  |                          |
| Never smoker                             | 268    | 0.90      | 1.00             | 306    | 0.54      | 1.00             | 0.7                      |
| Past smoker                              | 314    | 1.06      | 1.23 (1.04-1.46) | 100    | 0.62      | 1.30 (1.03-1.64) |                          |
| Current smoker                           | 76     | 2.34      | 2.91 (2.23-3.80) | 37     | 1.14      | 3.40 (2.38-4.85) |                          |
| <b>Acute myocardial infarction (AMI)</b> |        |           |                  |        |           |                  |                          |
| Never smoker                             | 132    | 0.46      | 1.00             | 174    | 0.31      | 1.00             | 0.8                      |
| Past smoker                              | 145    | 0.49      | 1.15 (0.90-1.47) | 56     | 0.34      | 1.26 (0.92-1.72) |                          |
| Current smoker                           | 34     | 1.01      | 2.77 (1.87-4.11) | 17     | 0.52      | 2.77 (1.66-4.64) |                          |
| <b>IHD, excluding AMI</b>                |        |           |                  |        |           |                  |                          |
| Never smoker                             | 136    | 0.44      | 1.00             | 132    | 0.23      | 1.00             | 0.8                      |
| Past smoker                              | 169    | 0.57      | 1.31 (1.04-1.65) | 44     | 0.28      | 1.36 (0.95-1.94) |                          |
| Current smoker                           | 42     | 1.33      | 3.03 (2.11-4.35) | 20     | 0.62      | 4.22 (2.56-6.95) |                          |
| <b>Cerebrovascular disease</b>           |        |           |                  |        |           |                  |                          |
| Never smoker                             | 161    | 0.58      | 1.00             | 252    | 0.46      | 1.00             | 0.7                      |
| Past smoker                              | 172    | 0.60      | 1.15 (0.92-1.43) | 67     | 0.42      | 0.91 (0.69-1.21) |                          |
| Current smoker                           | 28     | 1.16      | 2.46 (1.63-3.71) | 17     | 0.74      | 2.00 (1.21-3.30) |                          |
| <b>ANY MAJOR CVD</b>                     |        |           |                  |        |           |                  |                          |
| Never smoker                             | 591    | 2.04      | 1.00             | 798    | 1.42      | 1.00             | 0.6                      |
| Past smoker                              | 688    | 2.34      | 1.23 (1.10-1.38) | 245    | 1.51      | 1.15 (1.00-1.34) |                          |
| Current smoker                           | 139    | 4.66      | 2.67 (2.21-3.24) | 79     | 3.12      | 2.90 (2.28-3.68) |                          |

\*Age standardised rate per 1000 person-years.

RR (relative risk) adjusted for age, region of residence, alcohol consumption, annual household income, and education attainment. For definitions of outcomes see Additional file 2: Table S1.
